# Supplementary material for: Opioid-free anesthesia vs Opioid-based anesthesia
Source: Research Square preprint supplement (doi:10.21203/rs.3.rs-8269644/v1), 2026-01-22
Supplement: Supplementary file 1 [file 0ccdb0912deedc35f6bae06b.docx]

**Table 2. Demographic and Clinical Characteristics of Participants (n = 60)**

| Characteristics* | Participants  n= 60 (100%) | OFA  n=30 (50%) | OBA  n=30 (50%) | p |
| --- | --- | --- | --- | --- |
| **Age (years)** | 44,9 ± 10,6 | 47,2 ± 10,3 | 42,7 ± 10,5 | 0,102 |
| **Biological Sex** |  |  |  | 0,760 |
| Male | 14 (23,3) | 8 (26,7) | 6 (20,0) |  |
| Female | 46 (76,7) | 22 (73,3) | 24 (80,0) |  |
| **Alcohol consumption** |  |  |  | 0,302 |
| None | 29 (48,3) | 17 (56,7) | 12 (40,0) |  |
| Occasional | 30 (50,0) | 13 (43,3) | 17 (56,7) |  |
| Regular | 1 (1,7) | 0 (0,0) | 1 (3,3) |  |
| **Smoking** | 12 (20,0) | 5 (16,7) | 7 (23,3) | 0,747 |
| **Anthropometrics** |  |  |  |  |
| Weight (kg) | 109,1 ± 18,9 | 110,5 ± 20,1 | 107,8 ± 17,9 | 0,596 |
| Height (m) | 1,67 ± 0,07 | 1,67 ± 0,08 | 1,66 ± 0,06 | 0,375 |
| BMI (kg∕m2) | 39,1 ± 5,0 | 39,3 ± 5,0 | 39,0 ± 5,0 | 0,815 |
| **Comorbidities** | 44 (73,3) | 22 (73,3) | 22 (73,3) | 1,000 |
| Hypertension | 22 (36,7) | 13 (43,3) | 9 (30,0) | 0,422 |
| Dyslipidemia | 20 (33,3) | 12 (40,0) | 8 (26,7) | 0,411 |
| Type 2 Diabetes | 7 (11,7) | 4 (13,3) | 3 (10,0) | 1,000 |
| OSAS/OHS | 13 (21,7) | 7 (23,3) | 6 (20,0) | 1,000 |
| Metabolic Syndrome  Asthma | 1 (1,7)  3 (5,0) | 0 (0,0)  1 (3,3) | 1 (3,3)  2 (6,7) | 1,000  1,000 |
| GERD/Gastritis | 6 (10,0) | 1 (3,3) | 5 (16,7) | 0,195 |
| Depression | 19 (31,7) | 13 (43,3) | 6 (20,0) | 0,096 |
| Fibromyalgia | 1 (1,7) | 0 (0,0) | 1 (3,3) | 1,000 |
| Hipothyroidism | 8 (13,3) | 3 (10,0) | 5 (16,7) | 0,706 |
| Epilepsy  Chronic medication  β-blockers  Other anti-hypertensives  Statins  Glucocorticoids  Antidepressives  Oral Antidiabetics  Bronchodilators  Anticonvulsants  Levothyroxine | 2 (3,3)  39 (65,0)  7 (11,7)  14 (23,3)  17 (28,3)  1 (1,7)  21 (35,0)  6 (10,0)  4 (6,7)  2 (3,3)  8 (13,3) | 0 (0,0)  21 (70,0)  4 (13,3)  8 (26,7)  11 (36,7)  0 (0,0)  15 (50,0)  4 (13,3)  1 (3,3)  0 (0,0)  3 (10,0) | 2 (6,7)  18 (60,0)  3 (10,0)  6 (20,0)  6 (20,0)  1 (3,3)  6 (20,0)  2 (6,7)  3 (10,0)  2 (6,7)  5 (16,7) | 0,492  0,588  1,000  0,760  0,252  1,000  0,030  0,671  0,612  0,492  0,706 |
