# Supplementary material for: Opioid-free anesthesia vs Opioid-based anesthesia
Source: Research Square preprint supplement (doi:10.21203/rs.3.rs-8269644/v1), 2026-01-22
Supplement: Supplementary file 2 [file 62a4efa17f2e2dc030a89ec6.docx]

**Table 1. Anesthetic Protocols**

| **OBA group** | **OFA group** |
| --- | --- |
| Standard monitoring + BIS + TOF + NOL  Venous catheterization and initiation of goal-directed fluid therapy with balanced crystalloid  Start of remifentanil infusion (2 mg / 40 mL saline)  Induction with propofol  Neuromuscular blockade with rocuronium  Maintenance with desflurane  PONV prophylaxis with dexamethasone 4–8 mg after induction  Antibiotic prophylaxis with cefazolin 2–4 g  Stress-ulcer prophylaxis with esomeprazole 40 mg  Postoperative analgesia: paracetamol + ketorolac/parecoxib + metamizole  Administration of ondansetron 4 mg and droperidol 0.625 mg 30 minutes before the end of surgery  Termination of remifentanil infusion at the end of surgery  Reversal of neuromuscular blockade with sugammadex  Rescue analgesia in PACU with tramadol 100 mg and/or morphine  PONV treatment in PACU with ondansetron 4 mg | Standard monitoring + BIS + TOF + NOL  Venous catheterization and initiation of goal-directed fluid therapy with balanced crystalloid  Bolus of dexmedetomidine 15–20 µg followed by infusion: dexmedetomidine 50 µg + ketamine 50 mg + lidocaine 500 mg in 50 mL saline (rate: 1 mL / 10 kg total body weight)  Induction with propofol  Neuromuscular blockade with rocuronium  Maintenance with desflurane  PONV prophylaxis with dexamethasone 4–8 mg after induction  Antibiotic prophylaxis with cefazolin 2–4 g  Stress-ulcer prophylaxis with esomeprazole 40 mg  Postoperative analgesia: paracetamol + ketorolac/parecoxib + metamizole  Infusion rate reduced by half 30 minutes before the end of surgery (continued for 1 hour in PACU, until completion or discharge)  Reversal of neuromuscular blockade with sugammadex  Rescue analgesia in PACU with tramadol 100 mg  PONV treatment in PACU with ondansetron 4 mg |
