# Supplementary material for: Opioid-free anesthesia vs Opioid-based anesthesia
Source: Research Square preprint supplement (doi:10.21203/rs.3.rs-8269644/v1), 2026-01-22
Supplement: Supplementary file 3 [file 70c7678a30008b93134242d8.docx]

**Table 5. PONV Occurrence in OFA vs OBA Groups (n = 60)**

| Characteristics | Participants  n= 60 (100%) | OFA  n=30 (50%) | OBA  n=30 (50%) | p |
| --- | --- | --- | --- | --- |
| n (%) | n (%) | n (%) |
| **PONV Impact Scale Score 6 h PO** |  |  |  | 0,963 |
| 0 | 44 (73,3) | 22 (73,3) | 22 (73,3) |  |
| 1 | 7 (11,7) | 4 (13,3) | 3 (10,0) |  |
| 2 | 7 (11,7) | 3 (10,0) | 4 (13,3) |  |
| ≥ 3 | 2 (3,3) | 1 (3,3) | 1 (3,3) |  |
| **PONV Impact Scale Score 24 h PO** |  |  |  | 0,503 |
| 0 | 53 (88,3) | 27 (90,0) | 26 (86,7) |  |
| 1 | 2 (3,3) | 1 (3,3) | 1 (3,3) |  |
| 2 | 3 (5,0) | 2 (6,7) | 1 (3,3) |  |
| ≥ 3 | 2 (3,3) | 0 (0,0) | 2 (6,7) |  |
| **Need for PONV treatment** |  |  |  | 1,000 |
| Sim | 9 (15,0) | 5 (16,7) | 4 (13,3) |  |
| Não | 51 (85,0) | 25 (83,3) | 26 (86,7) |  |

*values expressed as mean ± SD or n (%), as appropriate
