# Supplementary material for: Opioid-free anesthesia vs Opioid-based anesthesia
Source: Research Square preprint supplement (doi:10.21203/rs.3.rs-8269644/v1), 2026-01-22
Supplement: Supplementary file 4 [file a560f8427a1f1cabcb1e1aa5.docx]

**Table 3. NOL Index Comparison Between OFA and OBA (n = 60)**

| Variables* | | Participants  n= 60  (100%) | | | | OFA  n=30  (50%) | | | | OBA  n=30 (50%) | | | | P | | | |
| --- | --- | --- | --- | --- | --- | --- | --- | --- | --- | --- | --- | --- | --- | --- | --- | --- | --- |
| **NOL Measurement Availability**  Measured  Not Measured | | 25 (41,7)  35 (58,3) | | | | 13 (43,3)  17 (56,7) | | | | 12 (40,0)  18 (60,0) | | | | 1,000 | | | |
| **NOL Index** | |  | | | |  | | | |  | | | |  | | | |
| 15 min | | 25 (100) | | | | 13 (100) | | | | 12 (100) | | | | - | | | |
| 30 min | | 25 (100) | | | | 13 (100) | | | | 12 (100) | | | | - | | | |
| 45 min | | 25 (100) | | | | 13 (100) | | | | 12 (100) | | | | - | | | |
| 60 min | | 24 (96,0) | | | | 13 (100) | | | | 11 (91,7) | | | | 0,480 | | | |
| 75 min | | 23 (92,0) | | | | 13 (100) | | | | 10 (83,3) | | | | 0,220 | | | |
| 90 min | | 20 (80,0) | | | | 11 (84,6) | | | | 9 (75,0) | | | | 0,645 | | | |
| 105 min | | 15 (60,0) | | | | 8 (61,5) | | | | 7 (58,3) | | | | 1,000 | | | |
| 120 min | | 14 (56,0) | | | | 8 (61,5) | | | | 6 (50,0) | | | | 0,859 | | | |
| 135 min | | 10 (41,7) | | | | 7 (53,8) | | | | 3 (27,3) | | | | 0,240 | | | |
| 150 min | | 3 (12,0) | | | | 1 (7,7) | | | | 2 (16,7) | | | | 0,593 | | | |
| 165 min | | 2 (8,0) | | | | 1 (7,7) | | | | 1 (8,3) | | | | 1,000 | | | |
| 180 min | | 2 (8,0) | | | | 1 (7,7) | | | | 1 (8,3) | | | | 1,000 | | | |
| **NOL Index 15 min** | |  | | | |  | | | |  | | | | 0,041 | | | |
| <10 | | 16 (64,0) | | | | 11 (84,6) | | | | 5 (41,7) | | | |  | | | |
| 10-25 | | 9 (36,0) | | | | 2 (15,4) | | | | 7 (58,3) | | | |  | | | |
| **NOL Index 30 min** | |  | | | |  | | | |  | | | | 0,056 | | | |
| <10 | | 18 (72,0) | | | | 12 (92,3) | | | | 6 (50,0) | | | |  | | | |
| 10-25 | | 5 (20,0) | | | | 1 (7,7) | | | | 4 (33,3) | | | |  | | | |
| 26-45 | | 2 (8,0) | | | | 0 (0,0) | | | | 2 (16,7) | | | |  | | | |
| **NOL Index 45 min** | |  | | | |  | | | |  | | | | 0,511 | | | |
| <10 | | 21 (84,0) | | | | 11 (84,6) | | | | 10 (83,3) | | | |  | | | |
| 10-25 | | 3 (12,0) | | | | 2 (15,4) | | | | 1 (8,3) | | | |  | | | |
| 26-45 | | 1 (4,0) | | | | 0 (0,0) | | | | 1 (8,3) | | | |  | | | |
| **NOL Index 60 min** | |  | | | |  | | | |  | | | | 0,132 | | | |
| <10 | | 21 (87,5) | | | | 13 (100) | | | | 8 (72,7) | | | |  | | | |
| 10-25 | | 2 (8,3) | | | | 0 (0,0) | | | | 2 (18,2) | | | |  | | | |
| 26-45 | | 1 (4,2) | | | | 0 (0,0) | | | | 1 (9,1) | | | |  | | | |
| **NOL Index 75 min** | |  | | | |  | | | |  | | | | 0,488 | | | |
| <10 | | 20 (87,0) | | | | 12 (92,3) | | | | 8 (80,0) | | | |  | | | |
| 10-25 | | 2 (8,7) | | | | 1 (7,7) | | | | 1 (10,0) | | | |  | | | |
| 26-45 | | 1 (4,3) | | | | 0 (0,0) | | | | 1 (10,0) | | | |  | | | |
| **NOL Index 90 min** | | | |  | | | |  | | |  | | | | | 0,174 | | | |
| <10 | | | 15 (75,0) | | | | 10 (90,9) | | | | | 5 (55,6) | | |  | | | |
| 10-25 | | | 4 (20,0) | | | | 1 (9,1) | | | | | 3 (33,3) | | |  | | | |
| 26-45 | | | 1 (5,0) | | | | 0 (0,0) | | | | | 1 (11,1) | | |  | | | |
| **NOL Index 105 min** | | |  | | | |  | | | | |  | | | 0,529 | | | |
| <10 | | | 12 (80,0) | | | | 7 (87,5) | | | | | 5 (71,4) | | |  | | | |
| 10-25 | | | 2 (13,3) | | | | 1 (12,5) | | | | | 1 (14,3) | | |  | | | |
| 26-45 | | | 1 (6,7) | | | | 0 (0,0) | | | | | 1 (14,3) | | |  | | | |

*values expressed as mean ± SD or n (%), as appropriate

**Table 3 (cont.). NOL Index Comparison Between OFA and OBA (n = 60)**

| Variables * | Participants  n= 60  (100%) | OFA  n=30  (50%) | OBA  n=30 (50%) | P |
| --- | --- | --- | --- | --- |
| **NOL Index 120 min** |  |  |  | 0,245 |
| <10 | 10 (71,4) | 7 (87,5) | 3 (50,0) |  |
| 10-25 | 4 (28,6) | 1 (12,5) | 3 (50,0) |  |
| **NOL Index 135 min** |  |  |  | 1,000 |
| <10 | 8 (80,0) | 6 (85,7) | 2 (66,7) |  |
| 10-25 | 2 (20,0) | 1 (14,3) | 1 (33,3) |  |
| **NOL Index 150 min** |  |  |  | 1,000 |
| <10 | 2 (66,7) | 1 (100) | 1 (50,0) |  |
| 10-25 | 1 (33,3) | 0 (0,0) | 1 (50,0) |  |
| **NOL Index 165 min** |  |  |  |  |
| <10 | 2 (100) | 1 (100) | 1 (100) | - |
| **NOL Index 180 min** |  |  |  | 1,000 |
| <10 | 1 (50,0) | 1 (100) | 0 (0,0) |  |
| 10-25 | 1 (50,0) | 0 (0,0) | 1 (100) |  |

*values expressed as mean ± SD or n (%), as appropriate
