# Supplementary material for: Opioid-free anesthesia vs Opioid-based anesthesia
Source: Research Square preprint supplement (doi:10.21203/rs.3.rs-8269644/v1), 2026-01-22
Supplement: Supplementary file 5 [file e07ede34cc3d9a58be5a8254.docx]

**Table 4. Comparison Between OFA and OBA Regarding Postoperative Pain During Hospitalization (n = 60)**

| Characteristics | Participants  n= 60 (100%) | OFA  n=30 (50%) | OBA  n=30 (50%) | p |
| --- | --- | --- | --- | --- |
| **Postoperative Paine (NRS)** |  |  |  |  |
| PACU Admission  PACU Discharge  First 24 hours  Hospital Discharge | 1 (0 – 4)  2 (0 – 3)  2 (1 – 4)  0 (0 – 2) | 0 (0 – 2)  1 (0 – 3)  1 (0 – 3)  0 (0 – 0) | 2,5 (0 – 5,5)  3 (1 – 5)  3 (2 – 4)  0 (0 – 2) | 0,051  0,004  0,035  0,023 |
| **Need for rescue analgesia** |  |  |  | 0,002 |
| Yes | 31 (51,7) | 9 (30,0) | 22 (73,3) |  |
| No | 29 (48,3) | 21 (70,0) | 8 (26,7) |  |
| **Use of opioids** |  |  |  | 0,503 |
| Yes | 29 (93,5) | 8 (88,9) | 21 (95,5) |  |
| No | 2 (6,5) | 1 (11,1) | 1 (4,5) |  |

* Median and interquartile ranges preserved
